# Supplementary material for: Association of olfactory and cognitive function test scores with hippocampal and amygdalar grey matter volume: a cross-sectional study
Source: PubMed Central journal article supplement — Sci Rep. 2024 Aug 19;14:19138. doi: 10.1038/s41598-024-69726-4 (PMC11333722; doi:10.1038/s41598-024-69726-4), 2024-08-19
Supplement: 41598_2024_69726_MOESM1_ESM.pdf [file 41598_2024_69726_MOESM1_ESM.pdf]

## **SUPPLEMENTARY INFORMATION**

### **Association of Olfactory and Cognitive Function Test Scores with Hippocampal and Amygdalar Grey Matter Volume: A Cross-Sectional Study**

Shuichi Sato, Takao Imaeda, Shunji Mugikura, Naoko Mori, Masaki Takanashi, Kazumi Hayakawa, Tomo Saito, Makiko Taira, Akira Narita, Mana Kogure, Ippei Chiba, Rieko Hatanaka, Kumi Nakaya, Ikumi Kanno, Ryosuke Ishiwata, Tomohiro Nakamura, Ikuko N. Motoike, Naoki Nakaya, Seizo Koshiba, Kengo Kinoshita, Shinichi Kuriyama, Soichi Ogishima, Fuji Nagami, Nobuo Fuse, Atsushi Hozawa

**Supplementary Table S1.** Multiple regressions without stratification for the left and right

hippocampi, left amygdala, and right parahippocampus, with the MoCA-J score as an

explanatory variable

| ROI                    | Explanatory and adjusted variables | Standardised partial regression coefficient |                      |                 |
|------------------------|------------------------------------|---------------------------------------------|----------------------|-----------------|
|                        |                                    | Estimate                                    | [ 95% CI ]           | <i>P</i> -value |
| Left hippocampus       | Olfactory score                    | 0.051                                       | [ 0.008 , 0.094 ]    | 0.020           |
|                        | MoCA-J score                       | 0.049                                       | [ 0.005 , 0.093 ]    | 0.029           |
|                        | Age                                | -0.507                                      | [ -0.553 , -0.462 ]  | <0.001          |
|                        | Sex                                | -0.213                                      | [ -0.262 , -0.163 ]  | <0.001          |
|                        | Education duration                 | -0.077                                      | [ -0.118 , -0.037 ]  | <0.001          |
|                        | Smoking history                    | 0.050                                       | [ 0.003 , 0.097 ]    | 0.036           |
| Right hippocampus      | Olfactory score                    | 0.050                                       | [ 0.007 , 0.093 ]    | 0.024           |
|                        | MoCA-J score                       | 0.045                                       | [ 0.001 , 0.088 ]    | 0.046           |
|                        | Age                                | -0.501                                      | [ -0.547 , -0.456 ]  | <0.001          |
|                        | Sex                                | -0.228                                      | [ -0.277 , -0.178 ]  | <0.001          |
|                        | Education duration                 | -0.095                                      | [ -0.135 , -0.055 ]  | <0.001          |
|                        | Smoking history                    | 0.045                                       | [ -0.001 , 0.092 ]   | 0.056           |
| Left amygdala          | Olfactory score                    | 0.052                                       | [ 0.006 , 0.098 ]    | 0.028           |
|                        | MoCA-J score                       | 0.057                                       | [ 0.010 , 0.104 ]    | 0.017           |
|                        | Age                                | -0.453                                      | [ -0.501 , -0.405 ]  | <0.001          |
|                        | Sex                                | -0.176                                      | [ -0.229 , -0.123 ]  | <0.001          |
|                        | Education duration                 | -0.060                                      | [ -0.102 , -0.017 ]  | 0.007           |
|                        | Smoking history                    | 0.061                                       | [ 0.012 , 0.111 ]    | 0.016           |
| Right parahippocampus  | Olfactory score                    | 0.039                                       | [ -0.007 , 0.085 ]   | 0.099           |
|                        | MoCA-J score                       | 0.049                                       | [ 0.002 , 0.096 ]    | 0.043           |
|                        | Age                                | -0.450                                      | [ -0.498 , -0.401 ]  | <0.001          |
|                        | Sex                                | -0.186                                      | [ -0.239 , -0.133 ]  | <0.001          |
|                        | Education duration                 | -0.094                                      | [ -0.137 , -0.051 ]  | <0.001          |
|                        | Smoking history                    | 0.046                                       | [ -0.004 , 0.096 ]   | 0.072           |
| Right olfactory cortex | Olfactory score                    | 0.024                                       | [ -0.023 , 0.072 ]   | 0.321           |
|                        | MoCA-J score                       | 0.076                                       | [ 0.028 , 0.124 ]    | 0.002           |
|                        | Age                                | -0.401                                      | [ -0.451 , -0.351 ]  | <0.001          |
|                        | Sex                                | -0.202                                      | [ -0.257 , -0.148 ]  | <0.001          |
|                        | Education duration                 | -0.047                                      | [ -0.091 , -0.003 ]  | 0.037           |
|                        | Smoking history                    | 0.051                                       | [ -0.00003 , 0.103 ] | 0.050           |

CI, confidence interval.

Regressions were performed using olfactory score, MoCA-J score, age, sex, education duration, and smoking history as explanatory variables.

**Supplementary Table S2.** Age-group-stratified (<65 and ≥65 years) multiple regressions for

the right amygdala and left parahippocampus and sex-stratified multiple regressions for the

left olfactory cortex, with the adjustment for the MoCA-J score

|                              |               | ROI                   | Explanatory and adjusted variables | Standardised partial regression coefficient |                     |         |
|------------------------------|---------------|-----------------------|------------------------------------|---------------------------------------------|---------------------|---------|
|                              |               |                       |                                    | Estimate                                    | [ 95% CI ]          | P-value |
| Stratification by age groups | Age <65 years | Right amygdala        | Olfactory score                    | 0.015                                       | [ -0.048 , 0.078 ]  | 0.646   |
|                              |               |                       | MoCA-J score                       | 0.008                                       | [ -0.067 , 0.082 ]  | 0.836   |
|                              |               |                       | Age                                | -0.272                                      | [ -0.365 , -0.180 ] | <0.001  |
|                              |               |                       | Sex                                | -0.193                                      | [ -0.267 , -0.120 ] | <0.001  |
|                              |               |                       | Education duration                 | -0.114                                      | [ -0.178 , -0.051 ] | <0.001  |
|                              |               |                       | Smoking history                    | 0.072                                       | [ 0.007 , 0.138 ]   | 0.031   |
|                              | Age ≥65 years | Right amygdala        | Olfactory score                    | 0.079                                       | [ 0.012 , 0.146 ]   | 0.020   |
|                              |               |                       | MoCA-J score                       | 0.075                                       | [ 0.014 , 0.137 ]   | 0.016   |
|                              |               |                       | Age                                | -0.638                                      | [ -0.783 , -0.493 ] | <0.001  |
|                              |               |                       | Sex                                | -0.108                                      | [ -0.186 , -0.030 ] | 0.007   |
|                              |               |                       | Education duration                 | -0.085                                      | [ -0.144 , -0.026 ] | 0.005   |
|                              |               |                       | Smoking history                    | 0.076                                       | [ -0.0002 , 0.152 ] | 0.051   |
| Stratification by sex        | Men           | Left olfactory cortex | Olfactory score                    | 0.064                                       | [ -0.008 , 0.135 ]  | 0.079   |
|                              |               |                       | MoCA-J score                       | 0.058                                       | [ -0.008 , 0.123 ]  | 0.084   |
|                              |               |                       | Age                                | -0.599                                      | [ -0.754 , -0.444 ] | <0.001  |
|                              |               |                       | Sex                                | -0.146                                      | [ -0.229 , -0.063 ] | 0.001   |
|                              |               |                       | Education duration                 | -0.078                                      | [ -0.141 , -0.015 ] | 0.016   |
|                              |               |                       | Smoking history                    | 0.080                                       | [ -0.001 , 0.161 ]  | 0.054   |
|                              | Women         | Left olfactory cortex | Olfactory score                    | -0.040                                      | [ -0.123 , 0.043 ]  | 0.343   |
|                              |               |                       | MoCA-J score                       | 0.078                                       | [ 0.004 , 0.152 ]   | 0.040   |
|                              |               |                       | Age                                | -0.365                                      | [ -0.446 , -0.285 ] | <0.001  |
|                              |               |                       | Education duration                 | -0.061                                      | [ -0.123 , 0.001 ]  | 0.053   |
|                              |               |                       | Smoking history                    | 0.062                                       | [ -0.015 , 0.140 ]  | 0.115   |
|                              |               |                       | Olfactory score                    | 0.013                                       | [ -0.044 , 0.071 ]  | 0.651   |
| MoCA-J score                 | 0.088         | [ 0.025 , 0.151 ]     | 0.006                              |                                             |                     |         |
| Age                          | -0.464        | [ -0.528 , -0.400 ]   | <0.001                             |                                             |                     |         |
| Education duration           | -0.038        | [ -0.100 , 0.025 ]    | 0.237                              |                                             |                     |         |
| Smoking history              | 0.022         | [ -0.047 , 0.090 ]    | 0.534                              |                                             |                     |         |

CI, confidence interval.

Regressions were performed using olfactory score, MoCA-J score, age, sex, education duration, and smoking history as explanatory variables in the age group stratification analysis and using olfactory score, MoCA-J score, age, education duration, and smoking history as explanatory variables in the sex stratification analysis.

**Supplementary Table S3.** Standardised partial regression coefficients for the interaction terms between age groups (age <60, 60-69, and  $\geq 70$  years) and olfactory test scores in multiple regression analysis for ICV-normalised GMVs

| Interaction terms                  | ROI                    | Regression coefficient of the interaction term |                    |                 |
|------------------------------------|------------------------|------------------------------------------------|--------------------|-----------------|
|                                    |                        | Estimate                                       | [ 95% CI ]         | <i>P</i> -value |
| Age group $\times$ olfactory score | Left hippocampus       | 0.025                                          | [ -0.015 , 0.064 ] | 0.223           |
|                                    | Right hippocampus      | 0.026                                          | [ -0.013 , 0.066 ] | 0.188           |
|                                    | Left amygdala          | 0.020                                          | [ -0.022 , 0.062 ] | 0.358           |
|                                    | Right amygdala         | 0.053                                          | [ 0.011 , 0.096 ]  | 0.013           |
|                                    | Left parahippocampus   | 0.043                                          | [ -0.001 , 0.086 ] | 0.054           |
|                                    | Right parahippocampus  | 0.040                                          | [ -0.002 , 0.083 ] | 0.063           |
|                                    | Left olfactory cortex  | -0.032                                         | [ -0.075 , 0.011 ] | 0.144           |
|                                    | Right olfactory cortex | -0.017                                         | [ -0.060 , 0.027 ] | 0.448           |

CI, confidence interval; ICV, intracranial volume; GMV, grey matter volume.

Regressions were performed using olfactory score, age, sex, education duration, smoking history, and the interaction term as explanatory variables and ICV-normalised GMVs as objective variables.

Numbers of samples: 486, 490, and 468 for people aged <60, 60-69, and  $\geq 70$  years, respectively.

**Supplementary Table S4.** Standardised partial regression coefficients for the interaction terms between age groups (age <55, 55-64, 65-74, and  $\geq 75$  years) and olfactory test scores in multiple regression analysis for ICV-normalised GMVs

| Interaction terms                  | ROI                    | Regression coefficient of the interaction term |            |         |                 |
|------------------------------------|------------------------|------------------------------------------------|------------|---------|-----------------|
|                                    |                        | Estimate                                       | [ 95% CI ] |         | <i>P</i> -value |
| Age group $\times$ olfactory score | Left hippocampus       | -0.111                                         | [ -0.244   | , 0.023 | ] 0.104         |
|                                    | Right hippocampus      | -0.073                                         | [ -0.206   | , 0.060 | ] 0.284         |
|                                    | Left amygdala          | -0.130                                         | [ -0.272   | , 0.013 | ] 0.074         |
|                                    | Right amygdala         | -0.087                                         | [ -0.230   | , 0.056 | ] 0.234         |
|                                    | Left parahippocampus   | -0.104                                         | [ -0.250   | , 0.043 | ] 0.164         |
|                                    | Right parahippocampus  | -0.038                                         | [ -0.182   | , 0.105 | ] 0.600         |
|                                    | Left olfactory cortex  | -0.051                                         | [ -0.197   | , 0.095 | ] 0.494         |
|                                    | Right olfactory cortex | -0.032                                         | [ -0.179   | , 0.115 | ] 0.673         |

CI, confidence interval; ICV, intracranial volume; GMV, grey matter volume.

Regressions were performed using olfactory score, age, sex, education duration, smoking history, and interaction term as explanatory variables and ICV-normalised GMVs as objective variables.

Numbers of samples: 309, 386, 589, and 160 for people aged <55, 55-64, 65-74, and  $\geq 75$  years, respectively.
